# Supplementary material for: Tumor-associated macrophages and individual chemo-susceptibility are influenced by iron chelation in human slice cultures of gastric cancer
Source: PubMed Central journal article supplement (PMC6677664; doi:10.18632/oncotarget.27089), 2019-07-30
Supplement: oncotarget-10-4731-s001.pdf [file oncotarget-10-4731-s001.pdf]

## Tumor-associated macrophages and individual chemosusceptibility are influenced by iron chelation in human slice cultures of gastric cancer

### SUPPLEMENTARY MATERIALS

**Supplementary Table 1: Clinical patient characteristics**

| Gender | Age, y | Sample ID | Tumor Location         | Histolog. Type (Lauren) | Grading | TNM    | Neoadjuvant Therapy | Response         |
|--------|--------|-----------|------------------------|-------------------------|---------|--------|---------------------|------------------|
| Female | 64     | #2        | Gastric Cancer, Antrum | Intestinal Type         | G3      | T1N0M0 | ECX                 | minimal response |
| Female | 67     | #6        | Gastric Cancer, Corpus | Intestinal Type         | G2      | T3N2M1 | FLO + trastuzumab   | minimal response |
| Female | 65     | #7        | Gastric Cancer, Antrum | Diffuse Type            | G3      | T3N2M0 | FLOT                | minimal response |
| Male   | 56     | #10       | Gastric Cancer, Corpus | Diffuse Type            | G3      | T2N0M0 | cisplatin *         | not rated        |
| Male   | 71     | #12       | Gastric Cancer, Antrum | Mixed Type              | G2      | T1N3M1 | FLOT, FOLFIRI       | minimal response |
| Male   | 68     | #14       | Gastric Cancer, Corpus | Diffuse Type            | G3      | T2N1M0 | not treated         | not treated      |
| Male   | 77     | #16       | AEG Type II, Cardia    | Diffuse Type            | G2      | T2N0M0 | not treated         | not treated      |

\*RCT of oropharyngeal cancer. Minimal response to neoadjuvant treatment means from pathologists rated no significant tumor reduction or minimal response (>50% vital tumor cells; Werner and Höfler 2000).

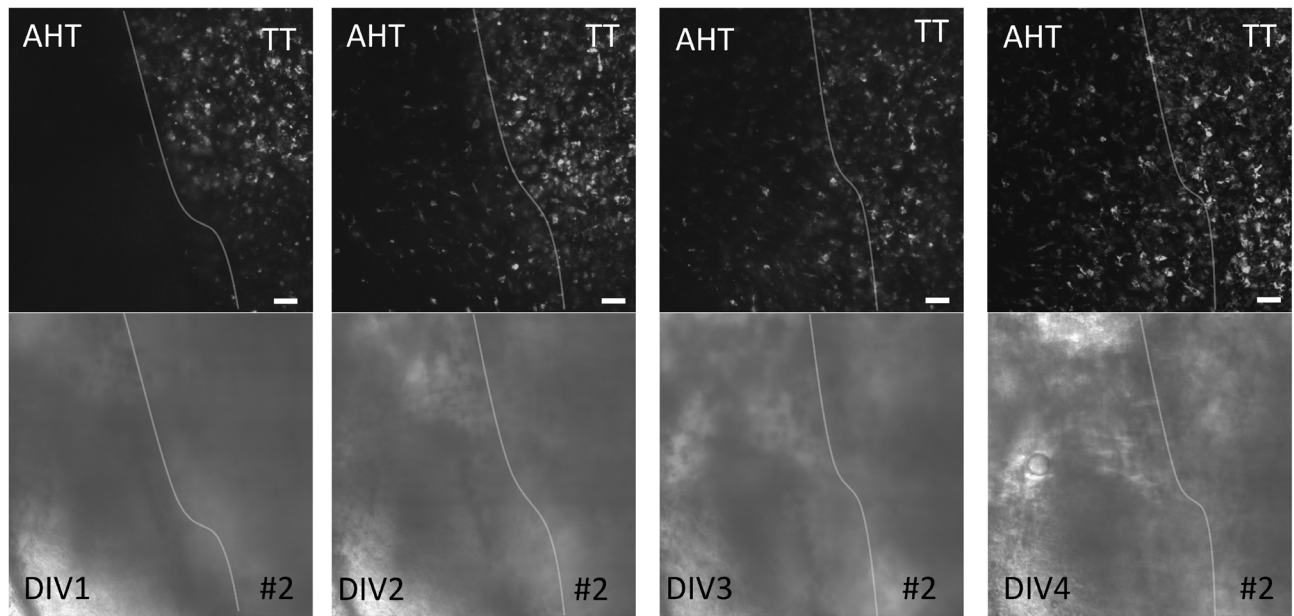

**Supplementary Figure 1: TAM migration in co-cultures of human gastric tissue TAM (IB4, upper picture, gray scale) in tumor tissue (TT) migrate into adjacent healthy tissue (AHT) from specimen #2 after DIV1-4. The respective light microscopy picture is shown on the bottom of the fluorescent picture. (Bars 50  $\mu$ m).**

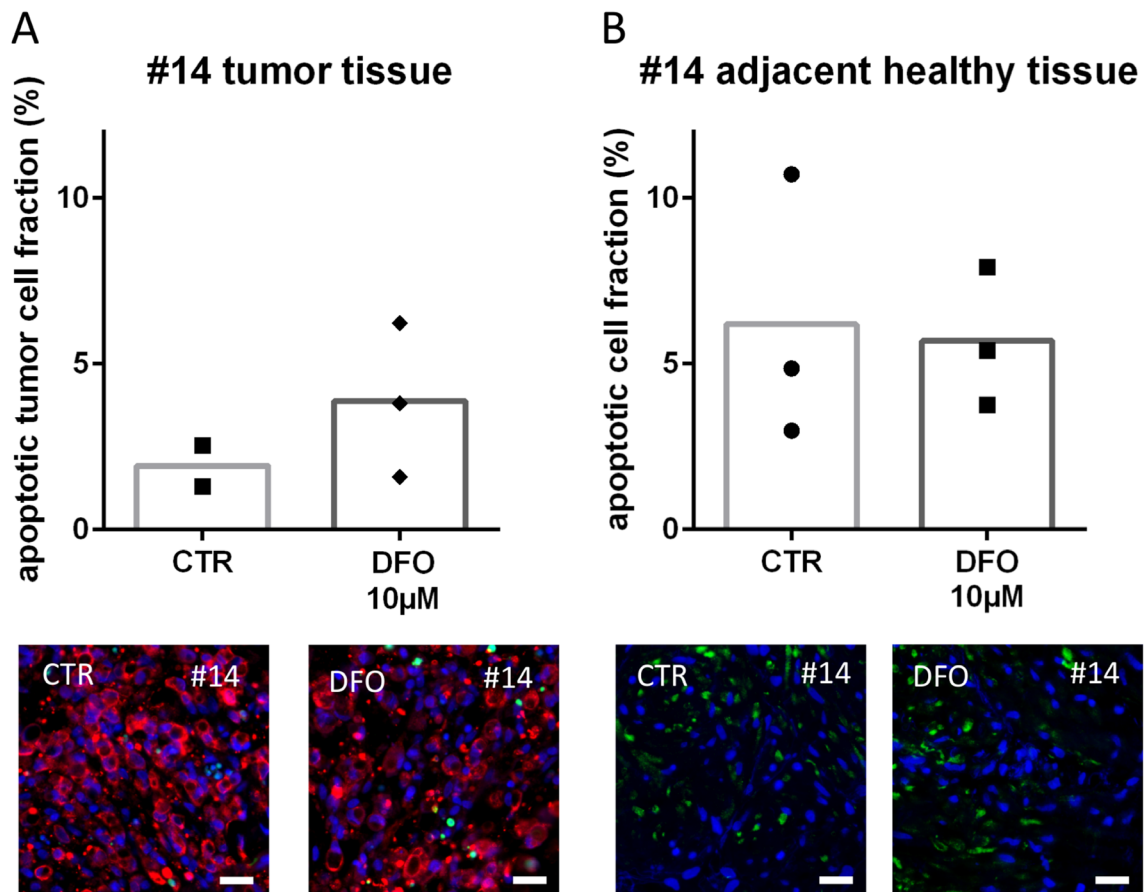

**Supplementary Figure 2: Tumor tissue vs. adjacent healthy tissue after DFO 10  $\mu$ M treatment. Apoptotic tumor cell fraction after 72h DFO (10  $\mu$ M) treatment in gastric cancer slice cultures (A) and apoptotic cell fraction after 72 h DFO (10  $\mu$ M) treatment in gastric adjacent healthy slice cultures (B) of specimen #14. Representative images of apoptotic tumor cell fraction in tumor tissue and adjacent healthy tissue are shown in the bottom of the graphs (nuclei, Hoechst; AE 1/3, red; cPARP, green). (Bars 20  $\mu$ m).**

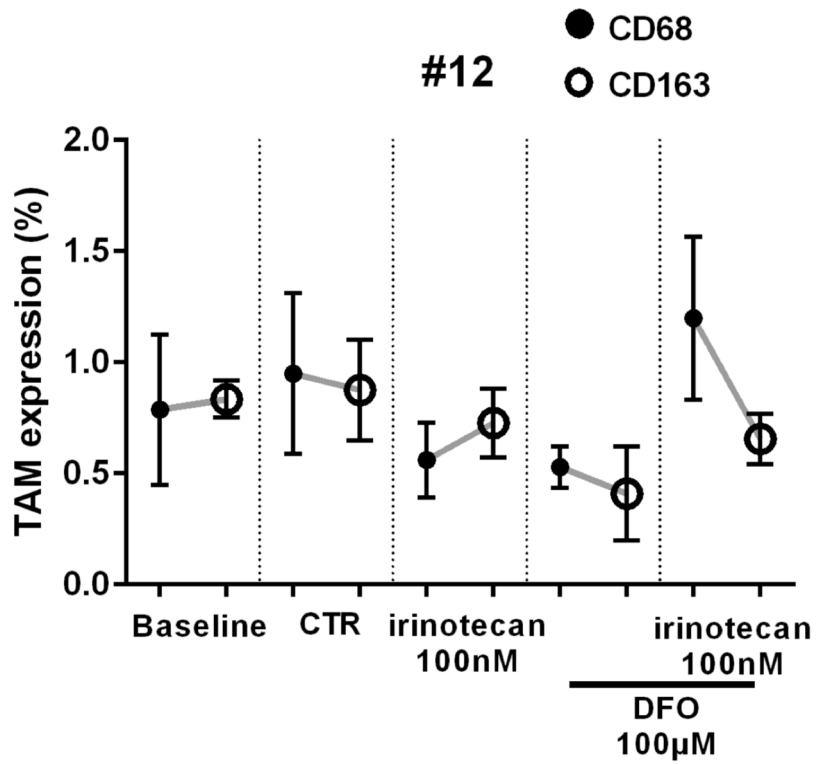

Supplementary Figure 3: TAM-phenotype expression after irinotecan and DFO treatment TAM (CD68; CD163) expression in overall tumor tissue after treatment in neoadjuvant treated specimen #12.

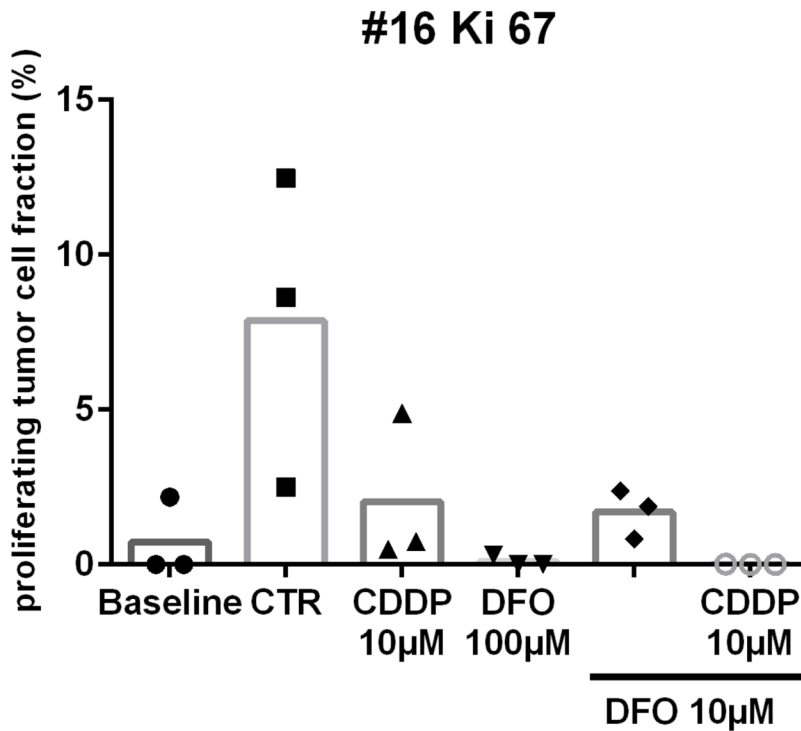

Supplementary Figure 4: Proliferating tumor cell fraction in specimen #16 Proliferating tumor cell fraction after treatment and DIV4 in chemo-naive specimen #16.

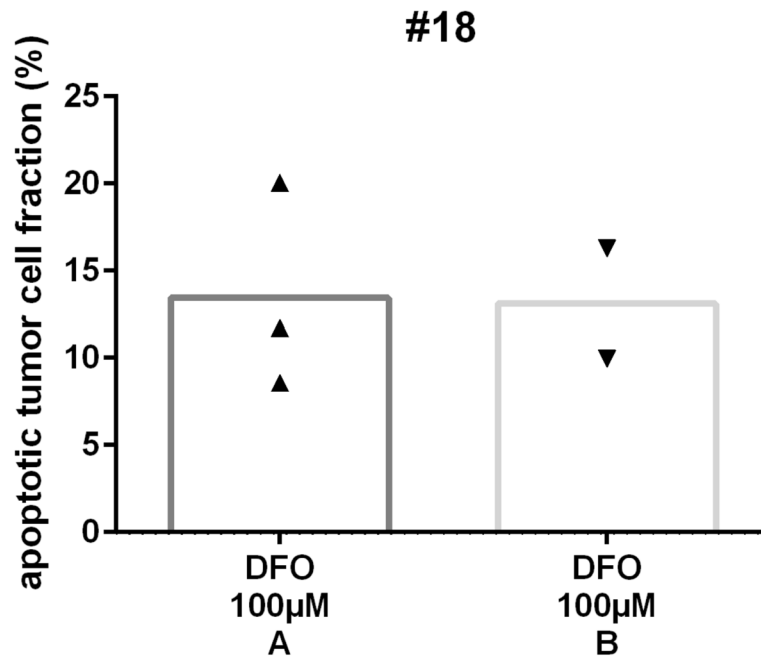

Supplementary Figure 5: Apoptotic tumor cell fraction in replicates of gastric tumor slice cultures Apoptotic tumor cell fraction after 72 h DFO (100 μM) treatment in tumor slice culture replicates.
